# Supplementary material for: Rapid quantitative analysis of raw rocks by LIBS coupled with feature-based transfer learning
Source: Royal Society of Chemistry journal article supplement (doi:10.1039/d3ja00341h), 2023-12-19
Supplement: d3ja00341h1.pdf [file d3ja00341h1.pdf]

## Supplementary information

### Rapid Quantitative Analysis of Raw Rocks by LIBS based on Feature-based Transfer Learning

Yu Rao<sup>a,c</sup>, Wenxin Ren<sup>a</sup>, Weiheng Kong<sup>a</sup>, Lingwei Zeng<sup>a</sup>, Mengfan Wu<sup>a</sup>, Xu Wang<sup>a</sup>, Jie Wang<sup>c</sup>,  
Qingwen Fan<sup>a</sup>, Yi Pan<sup>b</sup>, Jiebin Yang<sup>b,\*</sup> and Yixiang Duan<sup>a,\*</sup>

<sup>a</sup> *Research Center of Analytical Instrumentation, School of Mechanical Engineering, Sichuan University, Chengdu 610065, China*

<sup>b</sup> *National Institute of Measurement and Testing Technology, Chengdu, Sichuan 610021, China*

<sup>c</sup> *School of Mechanical Engineering, Sichuan University, Chengdu 610065, China*

---

\*\* Corresponding author.

E-mail address: 626056334@qq.com (Jiebin Yang), yduan@scu.edu.cn (Yixiang Duan).

## Table of Contents

|                                                                                                                                                      |             |
|------------------------------------------------------------------------------------------------------------------------------------------------------|-------------|
| <b>Table S1. The elemental content of all samples .....</b>                                                                                          | <b>S-3</b>  |
| <b>Table S2. The optimal parameters in the RFR prediction model.....</b>                                                                             | <b>S-5</b>  |
| <b>Table S3. The optimal parameters in the XGBoost prediction model.....</b>                                                                         | <b>S-6</b>  |
| <b>Table S4. The comparison of predictive performance of models based on transfer learning .....</b>                                                 | <b>S-7</b>  |
| <b>Table S5. The XGBoost model was trained with the raw rock data and validated with the validation set data .....</b>                               | <b>S-8</b>  |
| <b>Figure S1. A diagram of the two different forms of the samples .....</b>                                                                          | <b>S-9</b>  |
| <b>Figure S2. The LIBS spectral data of the normal position, cracked position and slope position were compared.....</b>                              | <b>S-10</b> |
| <b>Figure S3. The comparison between the normalized average spectrum of rock sample D1 and the corresponding spectrum of pressed sample P1 .....</b> | <b>S-11</b> |
| <b>Figure S4. The parameter optimization in PLSR and SVR algorithms .....</b>                                                                        | <b>S-12</b> |

**Table S1.** The elemental content of all samples. The content of Si, Al, Fe, Ca and Mg are high as major elements and Ti, Mn, K, Na and Ba are less as trace elements in the rocks. The elemental content in the table is converted by the percentage of mass fraction.

| Sample<br>s | Concentration (%) |        |        |        |        |       |       |       |       |       |
|-------------|-------------------|--------|--------|--------|--------|-------|-------|-------|-------|-------|
|             | Si                | Al     | Fe     | Ca     | Mg     | Ti    | Mn    | K     | Na    | Ba    |
| G1          | 0.289             | 0.053  | 0.028  | 21.443 | 13.080 | 0.009 | 0.008 | 0.032 | 0.022 | 0.004 |
| G2          | 3.850             | 0.053  | 0.040  | 23.621 | 10.800 | 0.002 | 0.021 | 0.008 | 0.019 | 0.003 |
| G3          | 3.929             | 0.635  | 0.333  | 20.521 | 11.856 | 0.022 | 0.015 | 0.032 | 0.024 | 0.288 |
| G4          | 0.873             | 0.109  | 0.171  | 21.586 | 12.510 | 0.005 | 0.012 | 0.015 | 0.009 | 0.234 |
| G5          | 1.008             | 0.132  | 0.174  | 21.536 | 12.546 | 0.007 | 0.012 | 0.022 | 0.008 | 0.223 |
| G6          | 2.436             | 0.374  | 0.250  | 21.071 | 12.258 | 0.013 | 0.014 | 0.027 | 0.017 | 0.250 |
| G7          | 33.987            | 7.094  | 2.291  | 1.107  | 0.252  | 0.172 | 0.046 | 4.157 | 2.322 | 0.034 |
| G8          | 28.289            | 8.561  | 5.289  | 3.714  | 1.032  | 0.309 | 0.060 | 1.568 | 2.864 | 0.102 |
| G9          | 20.832            | 7.322  | 15.291 | 6.293  | 4.662  | 1.420 | 0.131 | 1.925 | 2.508 | 0.053 |
| G10         | 25.424            | 9.381  | 5.185  | 0.993  | 0.390  | 0.288 | 0.093 | 6.207 | 5.312 | 0.025 |
| G11         | 29.428            | 8.524  | 3.305  | 1.764  | 0.504  | 0.480 | 0.069 | 4.290 | 2.270 | 0.105 |
| G12         | 27.851            | 8.767  | 4.244  | 3.371  | 1.686  | 0.462 | 0.073 | 2.904 | 3.005 | 0.190 |
| G13         | 16.655            | 7.486  | 17.321 | 7.043  | 3.150  | 4.614 | 0.150 | 0.124 | 1.565 | 0.009 |
| G14         | 33.964            | 6.861  | 2.245  | 0.421  | 0.096  | 0.180 | 0.108 | 4.506 | 1.907 | 0.051 |
| G15         | 30.926            | 8.645  | 3.428  | 1.900  | 0.978  | 0.180 | 0.043 | 2.157 | 3.932 | 0.114 |
| G16         | 23.156            | 7.285  | 18.760 | 6.857  | 4.320  | 0.551 | 0.160 | 0.398 | 1.536 | 0.062 |
| G17         | 23.324            | 13.908 | 7.385  | 0.093  | 0.276  | 0.420 | 0.040 | 0.656 | 0.045 | --    |
| G18         | 25.046            | 16.581 | 0.231  | 1.286  | 0.050  | 0.018 | 0.015 | 0.954 | 1.892 | --    |
| G19         | 31.099            | 7.031  | 3.870  | 2.307  | 1.104  | 0.396 | 0.068 | 2.074 | 1.343 | --    |
| G20         | 32.494            | 7.846  | 3.969  | 0.157  | 0.402  | 0.408 | 0.019 | 3.120 | 0.148 | 0.040 |
| G21         | 27.953            | 15.125 | 0.602  | 0.500  | 0.180  | 0.726 | --    | 1.278 | 1.291 | --    |
| G22         | 21.126            | 7.264  | 3.388  | 6.986  | 1.044  | 0.331 | 0.185 | 3.568 | 0.190 | --    |
| G23         | 27.641            | 9.964  | 5.320  | 0.429  | 1.206  | 0.395 | 0.017 | 3.452 | 0.260 | 0.045 |
| G24         | 0.784             | 0.180  | 0.112  | 28.029 | 1.044  | 0.010 | --    | 0.078 | 0.048 | --    |
| G25         | 0.294             | 0.074  | 0.077  | 23.071 | 1.482  | 0.006 | --    | 0.022 | 0.010 | 0.001 |
| G26         | 0.509             | 0.127  | 0.077  | 38.593 | 0.486  | 0.006 | 0.005 | 0.070 | 0.013 | 0.001 |
| G27         | 0.975             | 0.175  | 0.119  | 36.864 | 1.350  | 0.009 | 0.007 | 0.141 | 0.013 | 0.003 |
| G28         | 1.890             | 0.498  | 0.406  | 35.779 | 1.074  | 0.031 | 0.011 | 0.349 | 0.020 | 0.003 |
| G29         | 1.050             | 0.318  | 0.266  | 33.621 | 3.486  | 0.018 | 0.009 | 0.166 | 0.012 | 0.002 |
| G30         | 1.129             | 0.198  | 0.175  | 33.364 | 3.930  | 0.014 | 0.004 | 0.041 | 0.008 | 0.001 |
| G31         | 1.097             | 0.287  | 0.292  | 29.864 | 6.222  | 0.019 | 0.005 | 0.061 | 0.008 | 0.001 |
| G32         | 1.409             | 0.329  | 0.202  | 36.150 | 1.728  | 0.019 | 0.004 | 0.136 | 0.019 | 0.002 |
| G33         | 2.147             | 0.150  | 0.131  | 32.921 | 3.588  | 0.009 | 0.004 | 0.032 | 0.007 | 0.005 |
| G34         | 1.549             | 0.180  | 0.127  | 36.586 | 1.458  | 0.012 | 0.003 | 0.078 | 0.005 | 0.001 |
| G35         | 0.616             | 0.119  | 0.106  | 38.421 | 0.702  | 0.008 | 0.003 | 0.055 | 0.004 | 0.001 |
| G36         | 1.862             | 0.348  | 0.211  | 34.686 | 2.586  | 0.031 | 0.004 | 0.153 | 0.021 | 0.001 |
| G37         | 1.101             | 0.429  | 0.207  | 37.107 | 0.738  | 0.022 | 0.006 | 0.137 | 0.007 | 0.002 |
| G38         | 0.448             | 0.174  | 0.102  | 38.714 | 0.492  | 0.010 | 0.004 | 0.070 | 0.004 | 0.001 |

|     |        |        |       |        |       |       |       |       |       |       |
|-----|--------|--------|-------|--------|-------|-------|-------|-------|-------|-------|
| G39 | 0.390  | 0.128  | 0.100 | 38.400 | 0.900 | 0.007 | 0.004 | 0.040 | 0.004 | 0.001 |
| G40 | 7.280  | 2.663  | 3.040 | 25.479 | 3.114 | 0.196 | 0.043 | 0.647 | 0.059 | 0.012 |
| G41 | 3.103  | 0.360  | 0.147 | 36.500 | 0.426 | 0.023 | 0.003 | 0.124 | 0.022 | 0.001 |
| G42 | 0.257  | 0.090  | 0.252 | 34.207 | 4.056 | 0.007 | 0.007 | 0.036 | 0.016 | 0.001 |
| G43 | 0.336  | 0.116  | 0.268 | 29.964 | 6.972 | 0.013 | 0.007 | 0.043 | 0.022 | 0.001 |
| G44 | 0.140  | 0.079  | 0.054 | 39.636 | 0.144 | 0.004 | 0.023 | 0.010 | 0.010 | 0.001 |
| G45 | 0.504  | 0.095  | 0.225 | 38.629 | 0.852 | 0.004 | 0.003 | 0.036 | 0.011 | --    |
| G46 | 45.971 | 0.445  | 0.065 | 0.055  | 0.040 | 0.012 | 0.001 | 0.051 | 0.016 | 0.032 |
| G47 | 44.679 | 1.249  | 0.147 | 0.121  | 0.059 | 0.022 | 0.003 | 0.556 | 0.185 | 0.055 |
| G48 | 41.809 | 2.901  | 0.336 | 0.243  | 0.096 | 0.061 | 0.008 | 1.718 | 0.809 | 0.067 |
| G49 | 42.168 | 1.864  | 2.254 | 0.214  | 0.049 | 0.158 | 0.016 | 0.539 | 0.045 | 0.014 |
| D1  | 2.357  | 0.471  | 0.329 | 36.379 | 0.408 | --    | --    | 0.232 | 0.074 | 0.994 |
| D2  | 23.847 | 7.851  | 3.983 | 2.407  | 1.500 | 0.300 | 0.101 | 3.601 | 0.378 | 1.540 |
| D3  | 24.729 | 8.333  | 4.431 | 1.286  | 1.404 | 0.306 | 0.046 | 3.676 | 0.378 | 1.083 |
| D4  | 20.202 | 5.416  | 2.779 | 10.336 | 1.362 | 0.276 | 0.093 | 2.622 | 0.393 | 0.564 |
| D5  | 19.129 | 5.966  | 3.017 | 10.086 | 1.434 | 0.330 | 0.093 | 3.103 | 0.349 | 0.376 |
| D6  | 1.848  | 0.752  | 0.665 | 36.643 | 0.348 | 0.072 | 0.046 | 0.274 | 0.067 | 0.528 |
| D7  | 2.081  | 0.826  | 0.546 | 36.600 | 0.360 | --    | 0.070 | 0.290 | 0.074 | 0.421 |
| D8  | 3.682  | 1.493  | 1.085 | 34.036 | 0.342 | 0.150 | 0.062 | 0.573 | 0.126 | 0.466 |
| D9  | 4.219  | 1.599  | 1.918 | 32.707 | 0.678 | 0.108 | 0.209 | 0.581 | 0.141 | 0.510 |
| D10 | 23.105 | 11.192 | 4.172 | 2.214  | 0.762 | 0.456 | 0.015 | 5.219 | 0.334 | 0.492 |
| D11 | 2.030  | 0.228  | 0.175 | 36.143 | 1.182 | --    | --    | 0.124 | 0.074 | 0.949 |
| D12 | 24.486 | 9.503  | 5.075 | 1.336  | 1.536 | 0.366 | 0.077 | 4.116 | 0.275 | 0.564 |
| D13 | 22.115 | 6.983  | 3.304 | 9.029  | 1.506 | 0.444 | 0.070 | 3.659 | 0.282 | 0.439 |
| D14 | 3.043  | 1.329  | 1.113 | 34.693 | 0.336 | 0.120 | 0.070 | 0.548 | 0.082 | 0.492 |
| D15 | 4.405  | 1.901  | 1.512 | 32.607 | 0.378 | 0.162 | 0.046 | 0.846 | 0.126 | 0.412 |
| D16 | 4.368  | 1.932  | 1.435 | 32.621 | 0.372 | 0.198 | 0.062 | 0.788 | 0.134 | 0.439 |
| D17 | 2.464  | 0.926  | 2.261 | 35.307 | 0.438 | 0.072 | 0.077 | 0.249 | 0.126 | 0.851 |
| D18 | 2.805  | 0.937  | 1.477 | 35.450 | 0.528 | 0.072 | 0.225 | 0.407 | 0.119 | 0.475 |

**Table.S2** The optimal parameters in the RFR prediction model. The performance of the model is determined by the number and maximum depth of the decision trees. In this experiment, we employed the GridSearchCV function to conduct a grid search and cross-validation for the optimal parameters of the model, ultimately obtaining the optimal parameters for the prediction models of each element.

| The model of element | Si  | Al | Fe | Ca | Mg |
|----------------------|-----|----|----|----|----|
| Number of estimators | 100 | 50 | 50 | 50 | 50 |
| Max depth            | 10  | 20 | 20 | 10 | 30 |

**Table.S3** The optimal parameters in the XGboost prediction model. The performance of the model is determined by the learning factors, the number and maximum depth of the decision tree. In this experiment, we use the GridSearchCV function to perform a grid search and cross-validation of the optimal parameters of the model, and finally obtain the optimal parameters of the prediction model of each element.

| The model of element | Si   | Al   | Fe   | Ca   | Mg   |
|----------------------|------|------|------|------|------|
| Learning Rate        | 0.01 | 0.01 | 0.01 | 0.01 | 0.01 |
| Number of estimators | 100  | 100  | 100  | 100  | 100  |
| Max depth            | 10   | 20   | 10   | 30   | 10   |

**Table.S4** The comparison of predictive performance of models based on transfer learning.

| Test Set | GBW Samples |         |         |        |         |        |         |
|----------|-------------|---------|---------|--------|---------|--------|---------|
|          | Si          | Al      | Fe      | Ca     | Mg      | Mean   |         |
| PLSR     | RSD         | 0.0860  | 0.1639  | 0.3918 | 0.0485  | 0.2290 | 0.1839  |
|          | MAE         | 5.1243  | 1.7406  | 1.5335 | 6.0842  | 0.6110 | 3.0187  |
|          | RMSE        | 38.2007 | 5.7529  | 3.7643 | 60.2634 | 0.6316 | 21.7226 |
| SVR      | RSD         | 0.0503  | 0.0508  | 0.0776 | 0.0189  | 0.0894 | 0.0574  |
|          | MAE         | 3.8565  | 1.5914  | 0.4408 | 2.5776  | 0.8213 | 1.8575  |
|          | RMSE        | 28.8695 | 12.7702 | 1.0774 | 14.2983 | 2.6972 | 11.9425 |
| RFR      | RSD         | 0.0249  | 0.0447  | 0.1107 | 0.0260  | 0.0590 | 0.0530  |
|          | MAE         | 0.2862  | 0.0711  | 0.0794 | 0.1426  | 0.0658 | 0.1290  |
|          | RMSE        | 0.2148  | 0.0083  | 0.0111 | 0.0730  | 0.0109 | 0.0636  |
| XGBoost  | RSD         | 0.0173  | 0.0292  | 0.0744 | 0.0212  | 0.0667 | 0.0418  |
|          | MAE         | 0.2115  | 0.0656  | 0.0656 | 0.1826  | 0.0841 | 0.1219  |
|          | RMSE        | 0.0656  | 0.0087  | 0.0078 | 0.1122  | 0.0127 | 0.0414  |

**Table.S5** The XGBoost model was trained with the raw rock data and validated with the validation set data

| Data Set       |      | Elements |         |        |          |        |         |
|----------------|------|----------|---------|--------|----------|--------|---------|
|                |      | Si       | Al      | Fe     | Ca       | Mg     | Mean    |
| Test Set       | RSD  | 0.0011   | 0.0003  | 0.0003 | 0.0037   | 0.012  | 0.0035  |
|                | MAE  | 0.7428   | 0.3995  | 0.2801 | 0.5114   | 0.0591 | 0.3986  |
|                | RMSE | 0.6792   | 0.2112  | 0.1001 | 0.4379   | 0.0047 | 0.2866  |
| Validation Set | RSD  | 0.2059   | 0.2605  | 0.2527 | 0.1525   | 0.1957 | 0.2135  |
|                | MAE  | 11.1526  | 3.3086  | 0.9704 | 10.2568  | 0.3068 | 5.199   |
|                | RMSE | 143.8686 | 13.3744 | 1.1716 | 174.6432 | 0.1082 | 66.6332 |



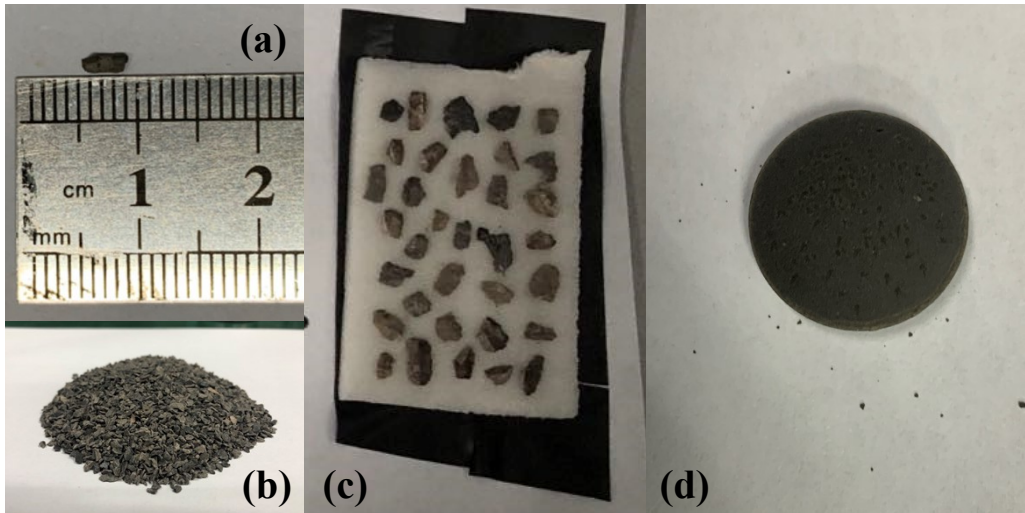

**Fig.S1.** In this experiment, two forms of samples (rock debris and pressed pellet) were used. (a) is the schematic of rock debris size, which ranges from 1 mm to 4 mm; (b) is all the screened rock debris of sample number D1; (c) is the 30 randomly selected rock debris, which was held in place on the sample table with double-sided adhesive tape; and (d) is the pressed pellet sample G1 of the Chinese national standard sample, 2g of each sample was placed in a pellet press and held under a pressure of 20 MPa for 5 minutes, producing pellets with a diameter of 20 mm and a thickness of 2 mm.

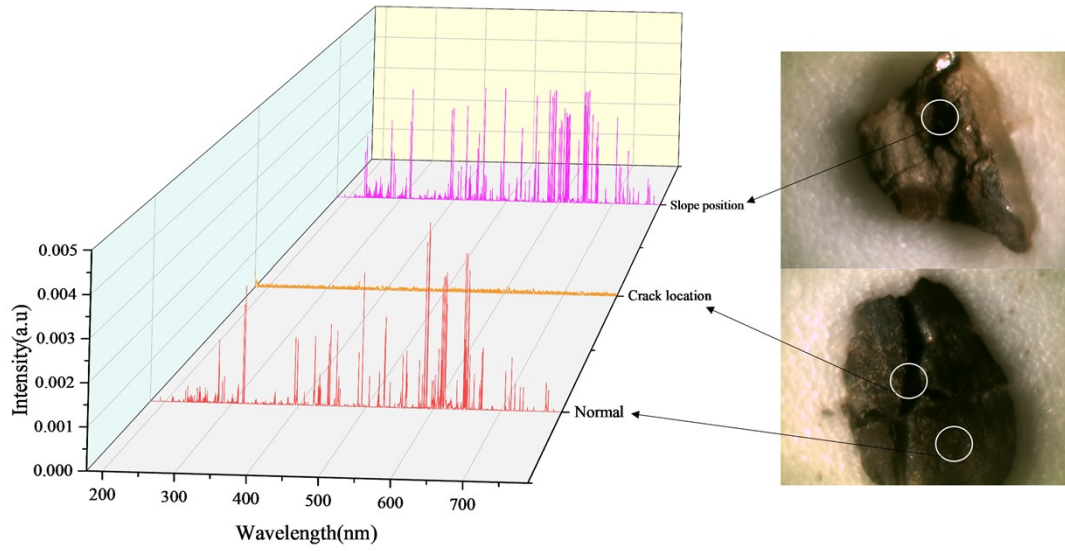

**Fig.S2.** The LIBS spectral data of the normal position, cracked position and slope position were compared. The cosine similarity scores were 0.9782 for the normal position, 0.1985 for the cracked position and 0.83 for the slope position.

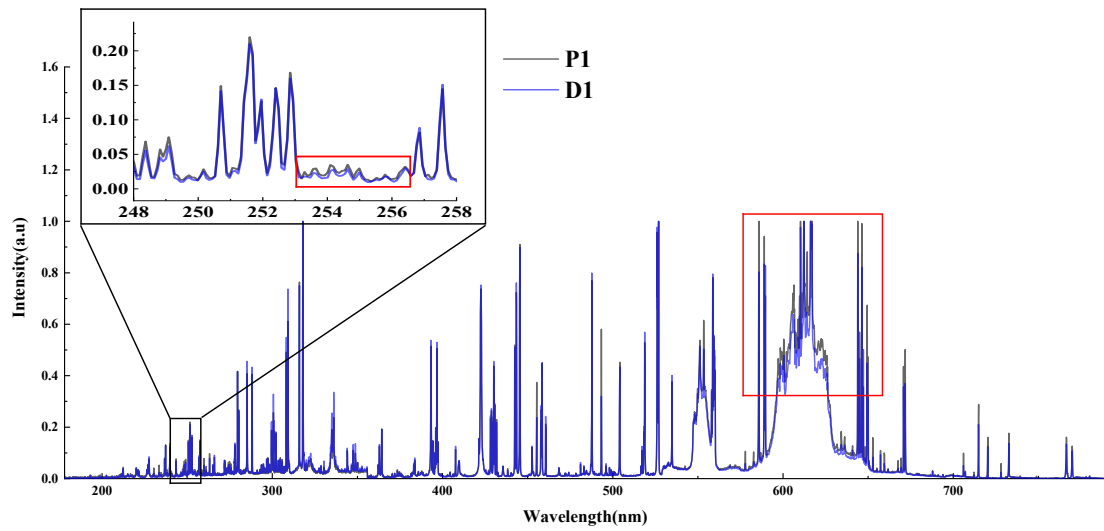

**Fig.S3.** The comparison between the normalized average spectrum of rock sample D1 and the corresponding spectrum of pressed sample P1. It shows that normalization can eliminate some mechanical errors and noise interference, but it still cannot completely eliminate the differences in spectra collected under different forms (indicated by the red box).

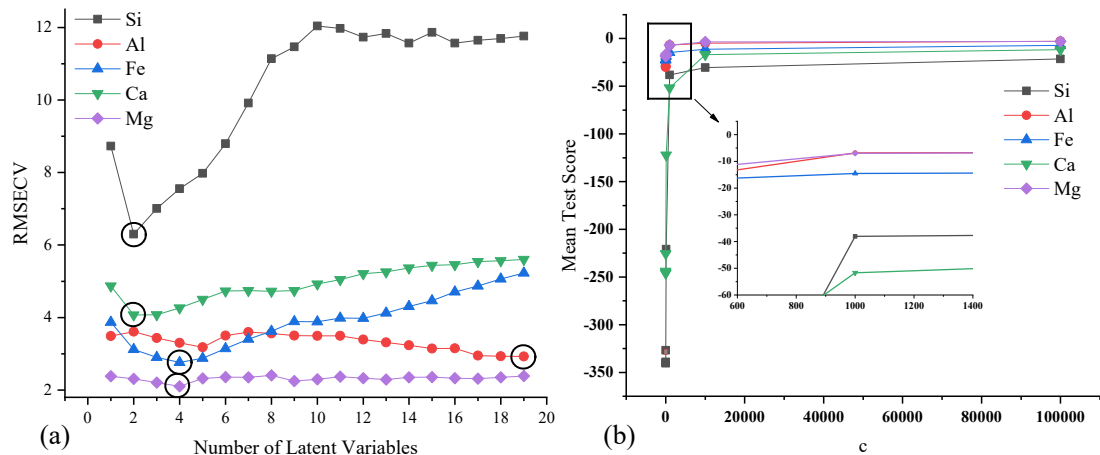

**Fig.S4.** The parameter optimization in PLSR and SVR algorithms. In this experiment, a ten-fold cross-validation method was employed to validate the models. (a) For PLSR, training and predicting models for Si, Al, Fe, Ca, and Mg, the impact of latent variable quantity on the root mean square error of cross-validation (RMSECV) was investigated. A smaller RMSECV value indicates better predictive capability. Hence, the chosen latent variable quantities were 2, 19, 4, 2, and 4 for Si, Al, Fe, Ca, and Mg, respectively. (b) The optimization process of SVR model parameters was conducted, considering the similarity between feature dimensions and sample quantities. The Linear kernel function was deemed more suitable for this regression task due to its advantages of fewer parameters and faster computation speed. Within the Linear kernel function, the penalty coefficient "C" was optimized. A larger "C" enhances model accuracy but weakens generalization, while a smaller "C" diminishes accuracy but improves generalization. In this experiment, the penalty factor "C" for each element in the training model was set to 1000.
